# Supplementary material for: Discovery of Pancreatic Ductal Adenocarcinoma-Related Aberrant Glycosylations: A Multilateral Approach of Lectin Microarray-Based Tissue Glycomic Profiling With Public Transcriptomic Datasets
Source: PubMed Central journal article supplement (PMC7082313; doi:10.3389/fonc.2020.00338), 2020-03-13
Supplement: Image_1.pdf [file Image_1.pdf]

**Supplementary Table 1. Abbreviations and carbohydrate specificities of 45 lectins on the LecChip Ver.1.0**

| Lectin   | Origin                             | Reactivity <sup>a</sup>                                                                                           |
|----------|------------------------------------|-------------------------------------------------------------------------------------------------------------------|
| LTL      | <i>Lotus tetragonolobus</i>        | Fuc $\alpha$ 1,3-GlcNAc; Sialyl Lewis x; Lewis x                                                                  |
| PSA      | <i>Pisum sativum</i>               | Fuc $\alpha$ 1,6-GlcNAc; $\alpha$ -Man                                                                            |
| LCA      | <i>Lens culinaris</i>              | Fuc $\alpha$ 1,6-GlcNAc; $\alpha$ -Man; $\alpha$ -Glc                                                             |
| UEA-I    | <i>Ulex europaeus</i>              | Fuc $\alpha$ 1,2-Gal $\beta$ 1,4-GlcNAc (Type II, H antigen)                                                      |
| AOL      | <i>Aspergillus oryzae</i>          | Terminal $\alpha$ -Fuc; Sialyl Lewis x; Lewis x                                                                   |
| AAL      | <i>Aleuria auranti</i>             | Terminal $\alpha$ -Fuc; Sialyl Lewis x; Lewis x                                                                   |
| MAL-I    | <i>Maackia amurensis</i>           | Sia $\alpha$ 2,3-Gal                                                                                              |
| SNA      | <i>Sambucus nigra</i>              | Sia $\alpha$ 2,6-Gal/GalNAc                                                                                       |
| SSA      | <i>Sambucus sieboldiana</i>        | Sia $\alpha$ 2,6-Gal/GalNAc                                                                                       |
| TJA-I    | <i>Trichosanthes japonica</i>      | Sia $\alpha$ 2,6-Gal $\beta$ 1,4-GlcNAc                                                                           |
| PHA-L    | <i>Phaseolus vulgaris</i>          | Tri/tetra-antennary complex-type <i>N</i> -glycan                                                                 |
| ECA      | <i>Erythrina cristagalli</i>       | Lac/LacNAc                                                                                                        |
| RCA120   | <i>Ricinus communis</i>            | Lac/LacNAc                                                                                                        |
| PHA-E    | <i>Phaseolus vulgaris</i>          | Bi-antennary complex-type <i>N</i> -glycan with outer Gal; Bisecting GlcNAc                                       |
| DSA      | <i>Datura stramonium</i>           | Chitin; PolyLacNAc; LacNAc                                                                                        |
| GSL-II   | <i>Griffonia simplicifolia</i>     | Agalactosylated tri/tetra antennary <i>N</i> -glycan                                                              |
| NPA      | <i>Narcissus pseudonarcissus</i>   | High-Mannose including Man $\alpha$ 1,6-Man                                                                       |
| ConA     | <i>Canavalia ensiformis</i>        | High-Mannose including Man $\alpha$ 1,6 (Man $\alpha$ 1,3)-Man                                                    |
| GNA      | <i>Galanthus nivalis</i>           | High-Mannose including Man $\alpha$ 1,3-Man                                                                       |
| HHL      | <i>Hippeastrum hybrid</i>          | High-Mannose including Man $\alpha$ 1,3-Man or Man $\alpha$ 1,6-Man                                               |
| ACG      | <i>Agroclybe cylindracea</i>       | Sia $\alpha$ 2,3-Gal $\beta$ 1,4-GlcNAc                                                                           |
| TxLC-I   | <i>Tulipa gesneriana</i>           | Man $\alpha$ 1,3(Man $\alpha$ 1,6)-Man; Bi/tri-antennary complex-type <i>N</i> -glycan; GalNAc                    |
| BPL      | <i>Bauhinia purpurea</i>           | Gal $\beta$ 1,3-GalNAc; Tri/tetra-antennary complex-type <i>N</i> -glycan with outer Gal                          |
| TJA-II   | <i>Trichosanthes japonica</i>      | Fuc $\alpha$ 1,2-Gal $\beta$ 1/GalNAc $\beta$ 1; Tri/tetra-antennary complex-type <i>N</i> -glycan with outer Gal |
| EEL      | <i>Euonymus europaeus</i>          | Gal $\alpha$ 1,3[Fuc $\alpha$ 1,2-Gal] (B antigen); Gal $\alpha$ 1,3-Gal                                          |
| ABA      | <i>Agaricus bisporus</i>           | Gal $\beta$ 1,3-GalNAc $\alpha$ -Thr/Ser (T antigen); Sialyl-T                                                    |
| LEL      | <i>Lycopersicon esculentum</i>     | Chitin; PolyLacNAc                                                                                                |
| STL      | <i>Solanum tuberosum</i>           | Chitin; PolyLacNAc                                                                                                |
| UDA      | <i>Urtica dioica</i>               | Chitin; PolyLacNAc                                                                                                |
| PWM      | <i>Phytolacca Americana</i>        | Chitin; PolyLacNAc                                                                                                |
| Jacalin  | <i>Artocarpus integrifolia</i>     | Gal $\beta$ 1,3-GalNAc $\alpha$ -Thr/Ser (T); GalNAc $\alpha$ -Thr/Ser (Tn antigen)                               |
| PNA      | <i>Arachis hypogaea</i>            | Gal $\beta$ 1,3-GalNAc $\alpha$ -Thr/Ser (T)                                                                      |
| WFA      | <i>Wisteria floribunda</i>         | GalNAc $\beta$ 1,4-GlcNAc (LacdiNAc); Terminal GalNAc                                                             |
| ACA      | <i>Amaranthus caudatus</i>         | Gal $\beta$ 1,3-GalNAc $\alpha$ -Thr/Ser (T)                                                                      |
| MPA      | <i>Maclura pomifera</i>            | Gal $\beta$ 1,3-GalNAc $\alpha$ -Thr/Ser (T); GalNAc $\alpha$ -Thr/Ser (Tn)                                       |
| HPA      | <i>Helix pomatia</i>               | Terminal GalNAc                                                                                                   |
| VVA      | <i>Vicia villosa</i>               | $\alpha$ -, $\beta$ -linked terminal GalNAc; GalNAc $\alpha$ -Thr/Ser (Tn)                                        |
| DBA      | <i>Dolichos biflorus</i>           | GalNAc $\alpha$ -Thr/Ser (Tn); GalNAc $\alpha$ 1,3-GalNAc                                                         |
| SBA      | <i>Glycine max</i>                 | Terminal GalNAc (especially GalNAc $\alpha$ 1,3-Gal)                                                              |
| Calsepa  | <i>Calystegia sepium</i>           | Man; Maltose                                                                                                      |
| PTL-I    | <i>Psophocarpus tetragonolobus</i> | $\alpha$ -GalNAc; Gal                                                                                             |
| MAH      | <i>Maackia amurensis</i>           | Sia $\alpha$ 2,3-Gal $\beta$ 1,3(Sia $\alpha$ 2,6)-GalNAc (disialyl-T)                                            |
| WGA      | <i>Triticum aestivum</i>           | Chitin; Multivalent Sia                                                                                           |
| GSL-I-A4 | <i>Griffonia simplicifolia</i>     | $\alpha$ -GalNAc; GalNAc $\alpha$ -Thr/Ser (Tn)                                                                   |
| GSL-I-B4 | <i>Griffonia simplicifolia</i>     | $\alpha$ -Gal                                                                                                     |

<sup>a</sup>These reactivity of lectins were based on Lectin Frontier Database (LfDB; <https://acgg.asia/lfdb2/>).

**Supplementary Table 2. Clinicopathologic features for 14 PDAC cases.**

|                          |               |
|--------------------------|---------------|
| Age                      | [Range]       |
| Mean, years              | 67.4 [55-84]  |
| Gender                   |               |
| Male                     | 10            |
| Female                   | 4             |
| Blood type               |               |
| O                        | 3             |
| A                        | 8             |
| B                        | 2             |
| AB                       | 1             |
| Tumor location           |               |
| Head                     | 4             |
| Body                     | 4             |
| Tail                     | 6             |
| Tumor size               |               |
| Mean, cm                 | 3.0 [1.6-5.7] |
| Tumor grade              |               |
| G1                       | 1             |
| G2                       | 10            |
| G3                       | 3             |
| Stage (AJCC 8th edition) |               |
| I                        | 3             |
| II                       | 10            |
| III                      | 1             |

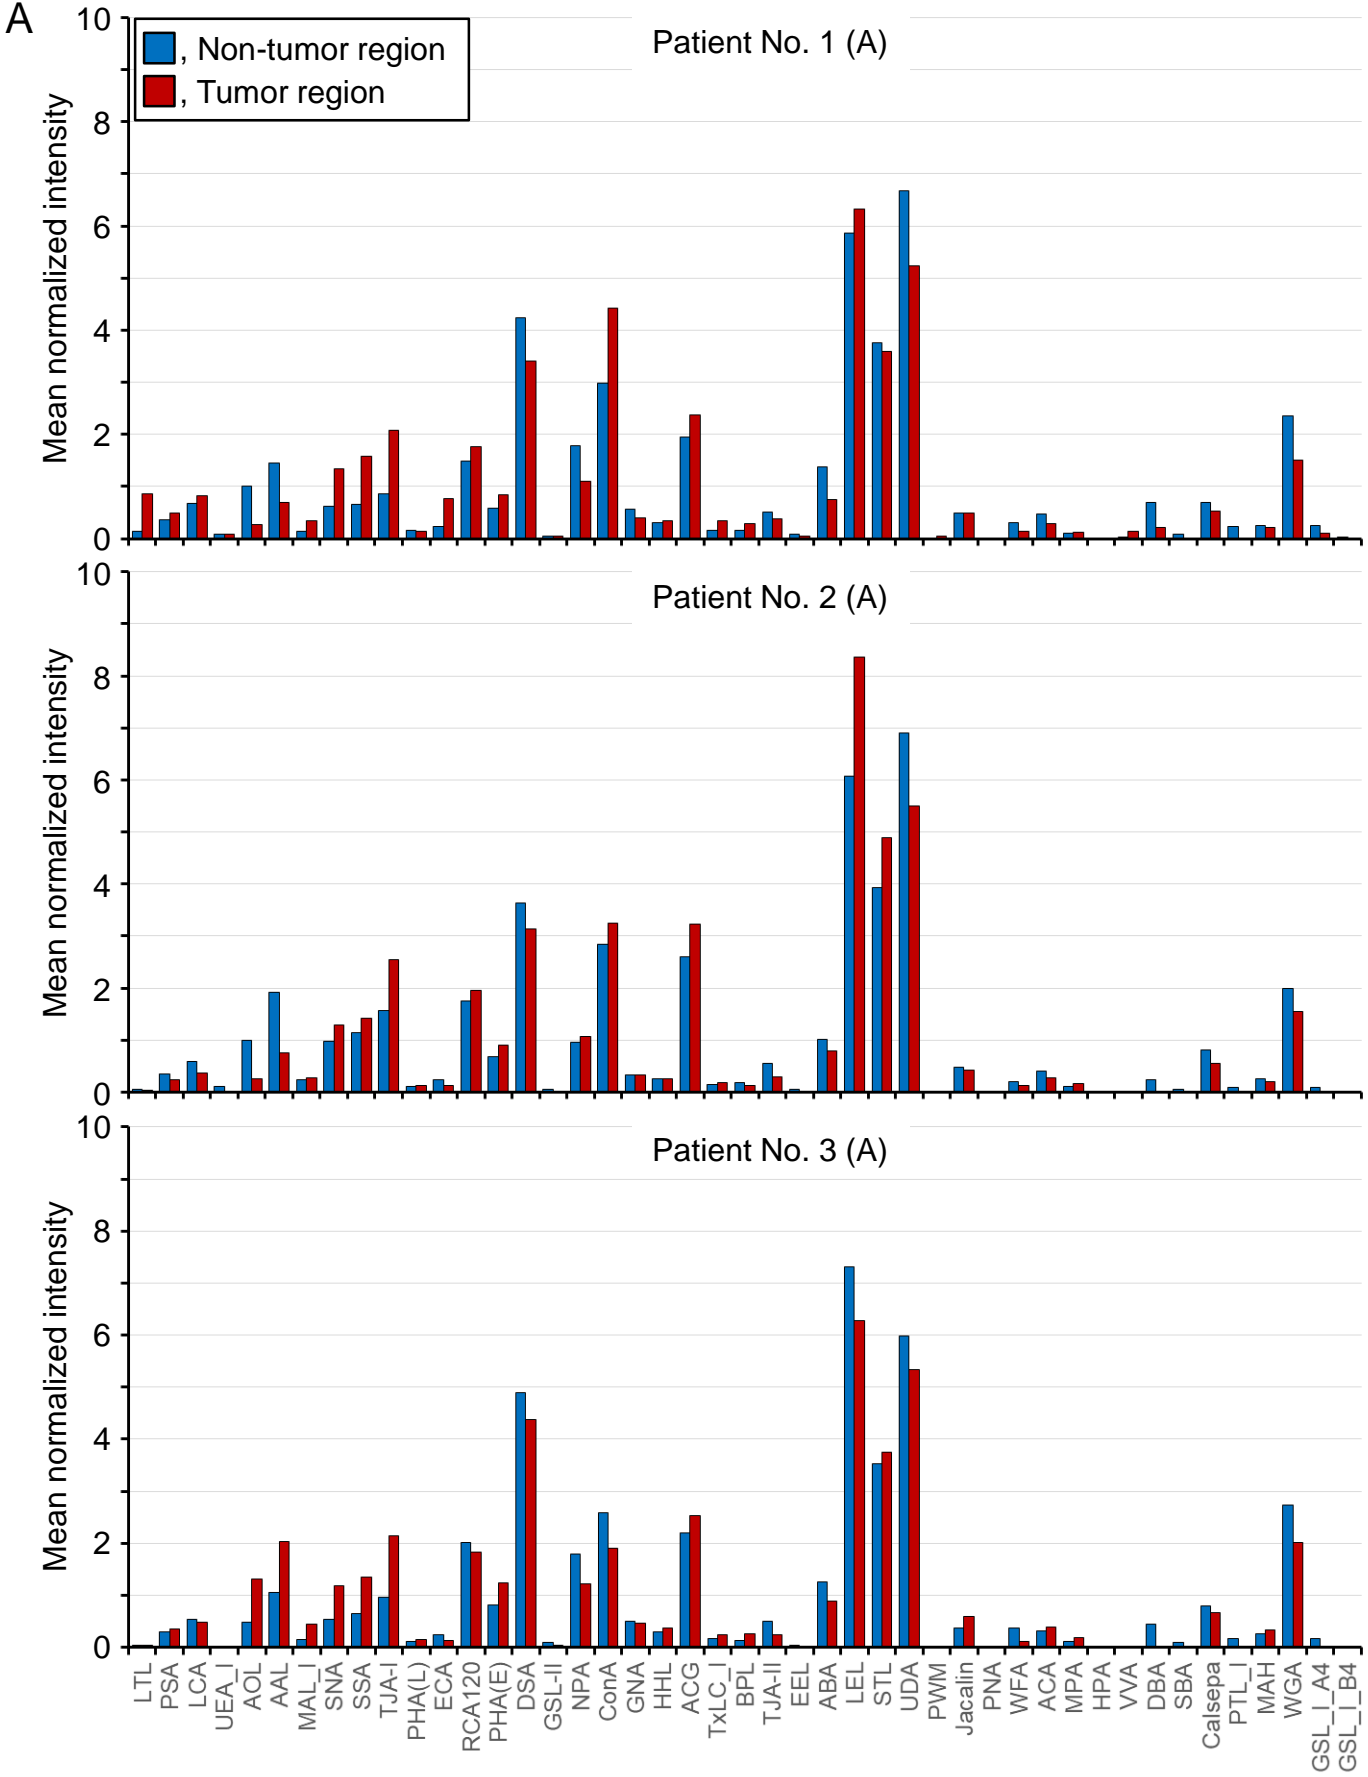

**Supplementary Figure 1. The tissue glycomic profiles of 14 PDAC cases.**  
 (A) Blood type A (Patient No. 1–8), (B) Blood type B (No. 9–10), (C) Blood type O (No. 11–13), and (D) Blood type AB (No.14). Blue, non-tumor regions; Red, tumor regions.

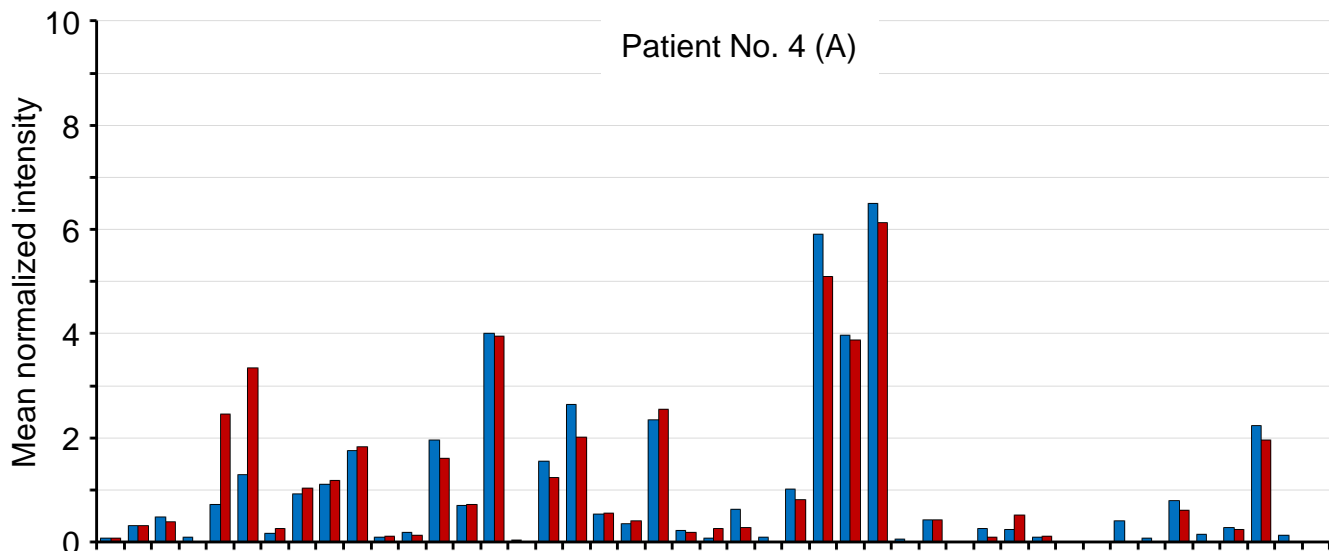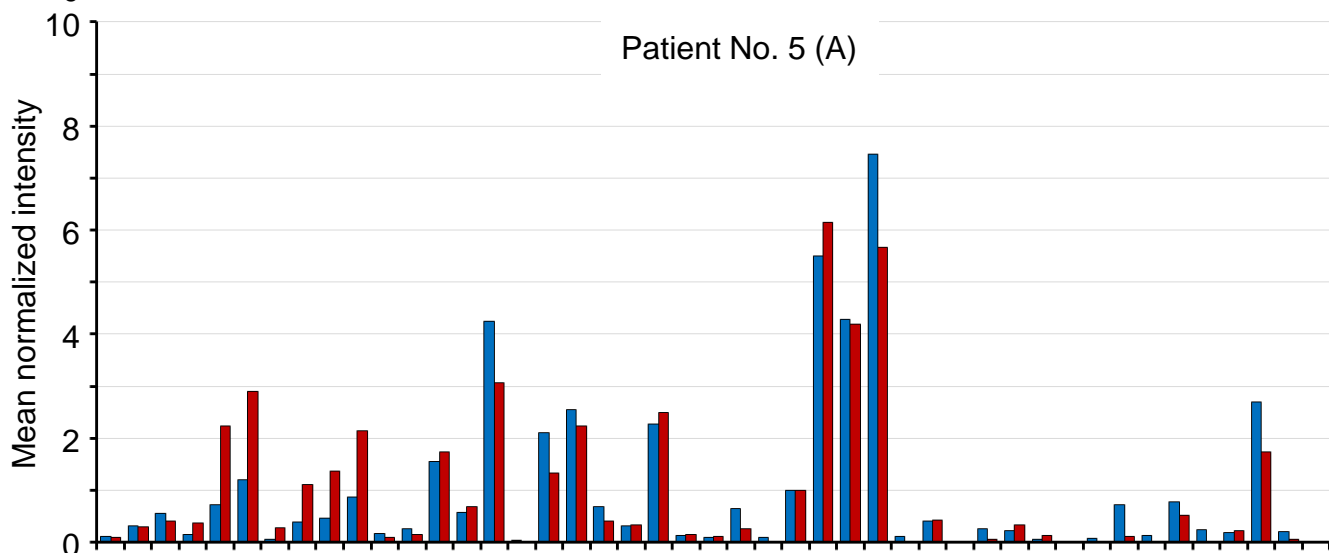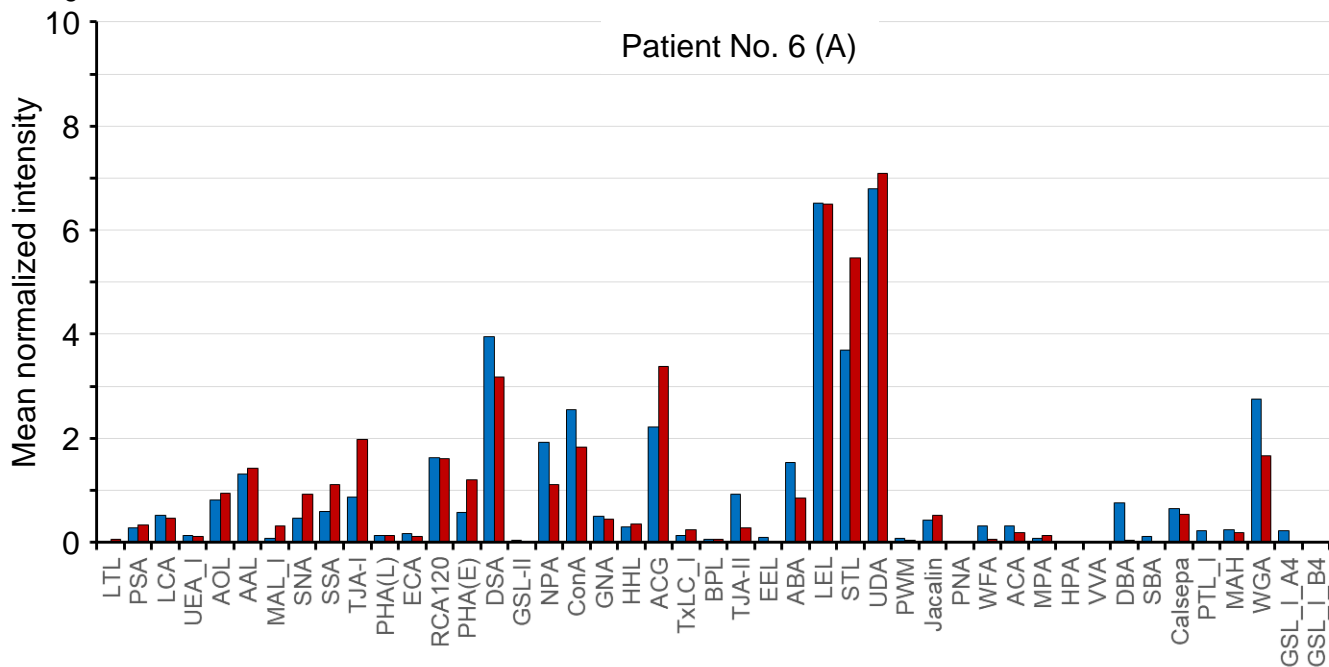

Supplementary Figure 1. Continued

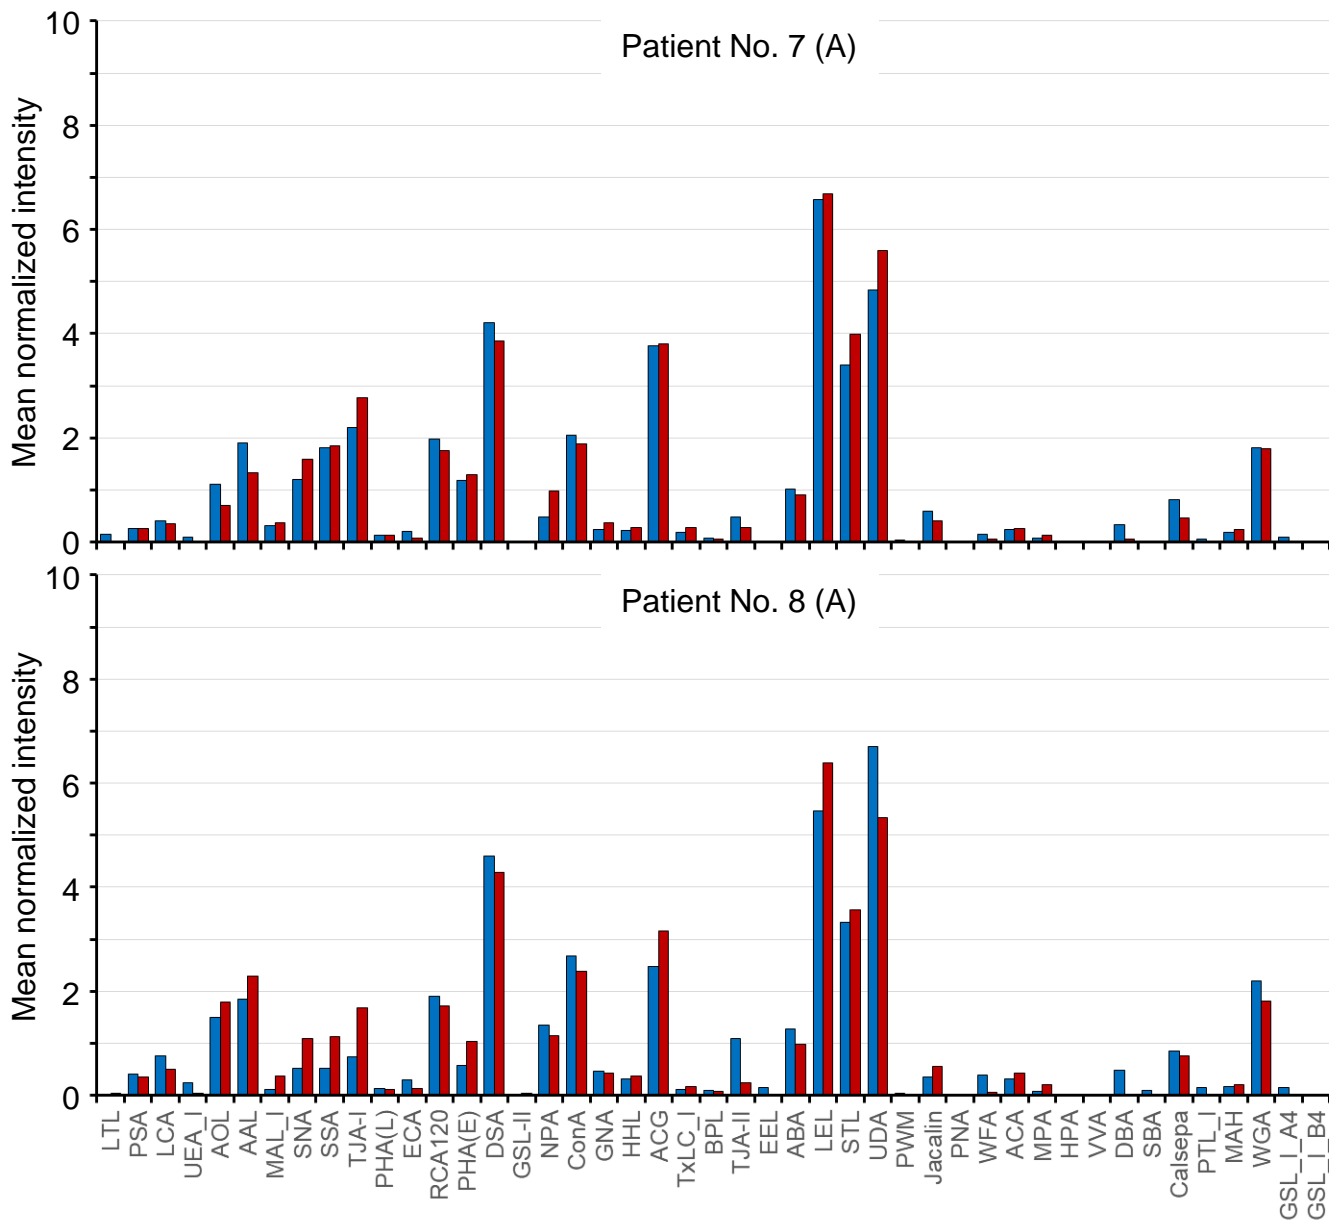

Supplementary Figure 1. Continued

**B**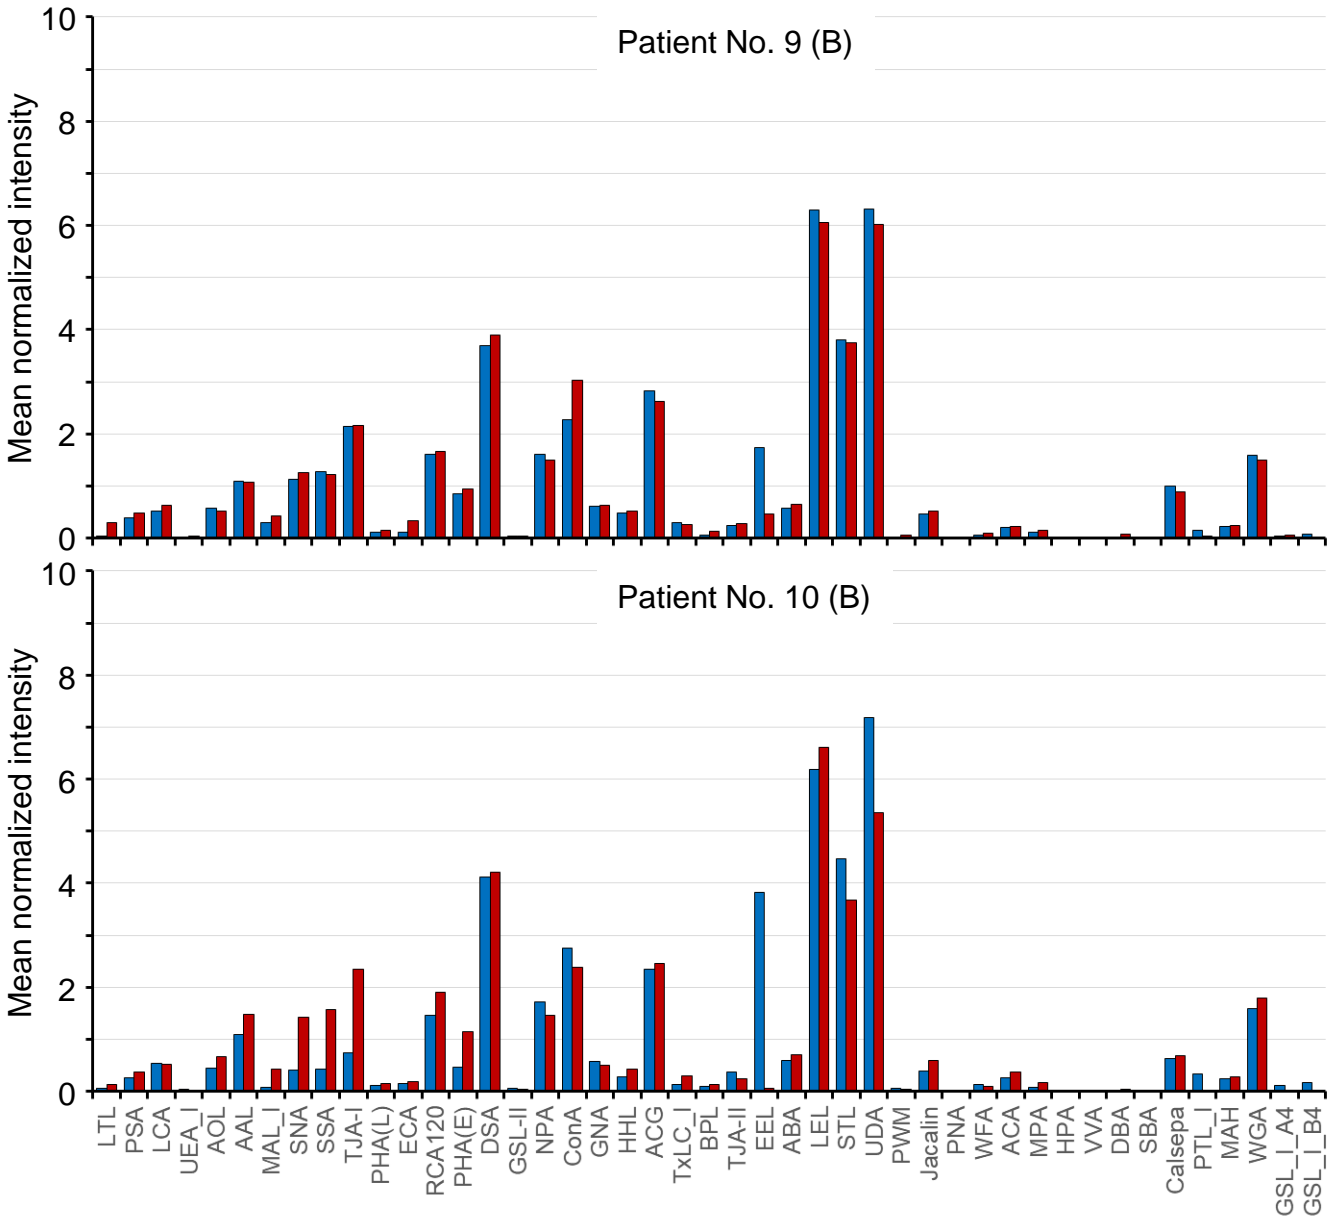**Supplementary Figure 1. Continued**

**C**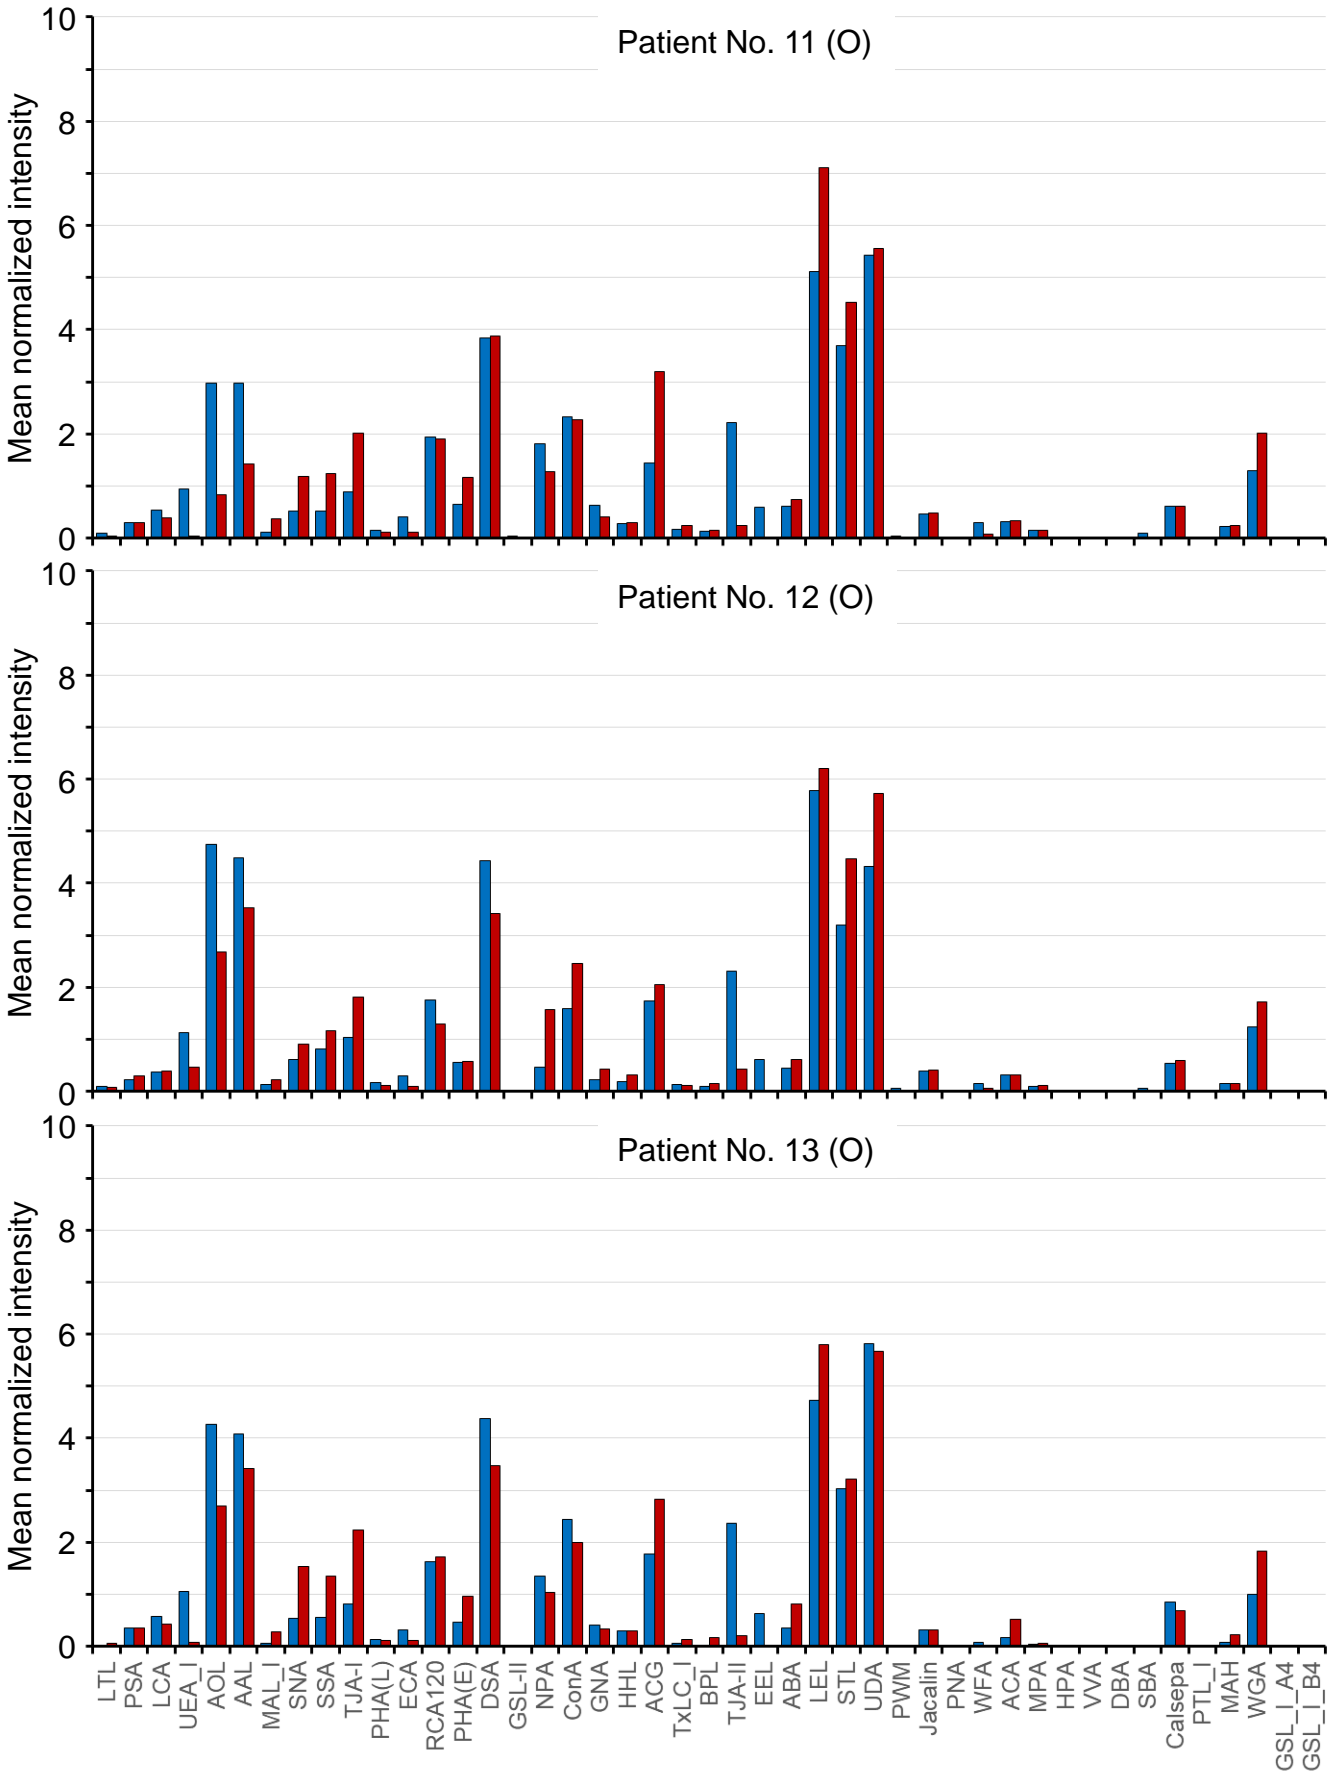**Supplementary Figure 1. Continued**

**D**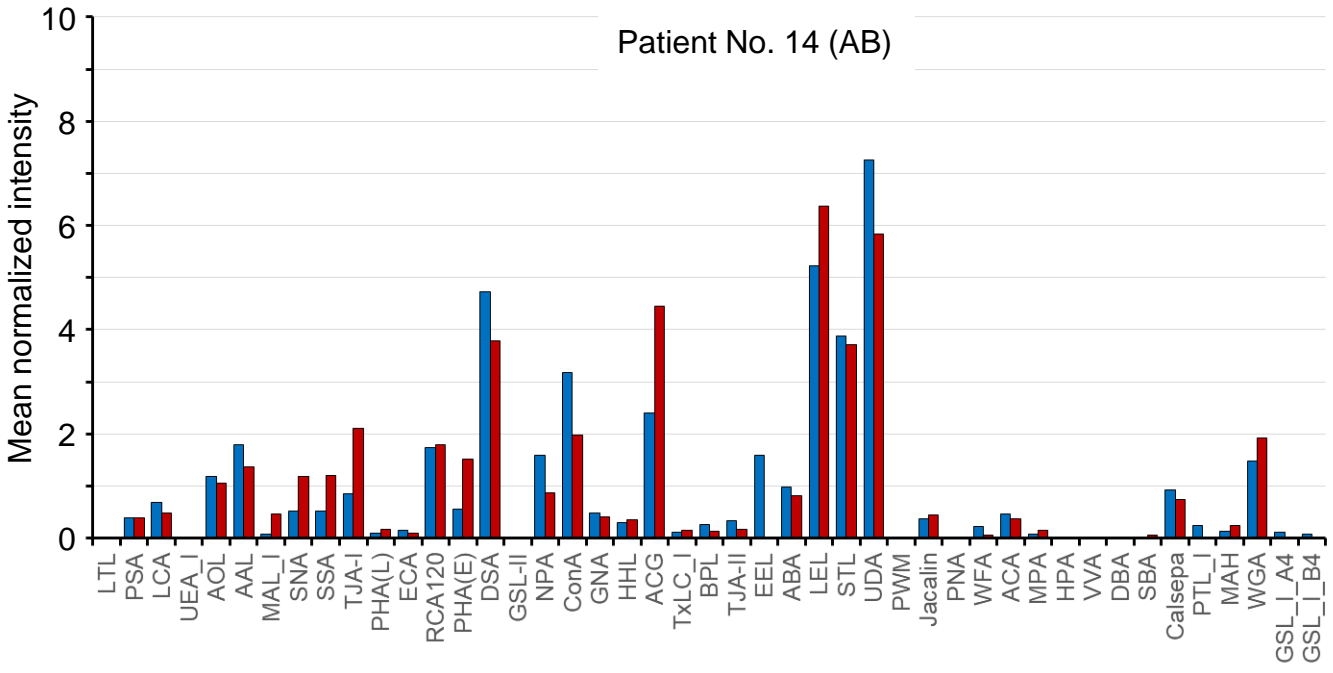**Supplementary Figure 1. Continued**



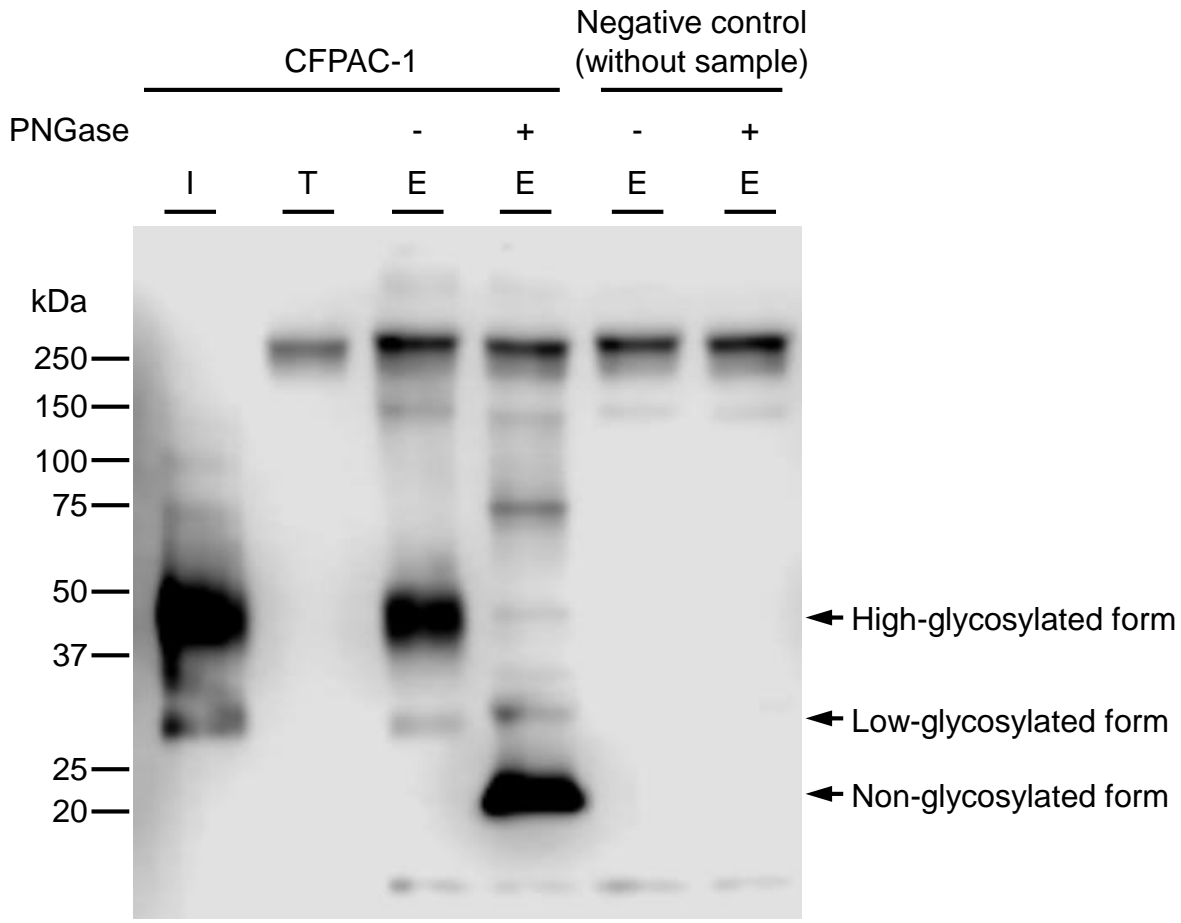

IP/IB,  $\alpha$ -Basigin mAb

**Supplementary Figure 2. Western blot analysis for basigin immunoprecipitated from the cell membrane fractions of CFPAC-1.**

This *N*-glycoprotein was detected as high- and low-glycosylated forms in the input (I) and elution fraction (E) and not detected in the through fraction (T). After treatment of the immunoprecipitated basigin with peptide:*N*-glycanase (PNGase), the high-glycosylated form was decreased, and the non-glycosylated form became dominant.

Patient No. 8 (Blood type A)

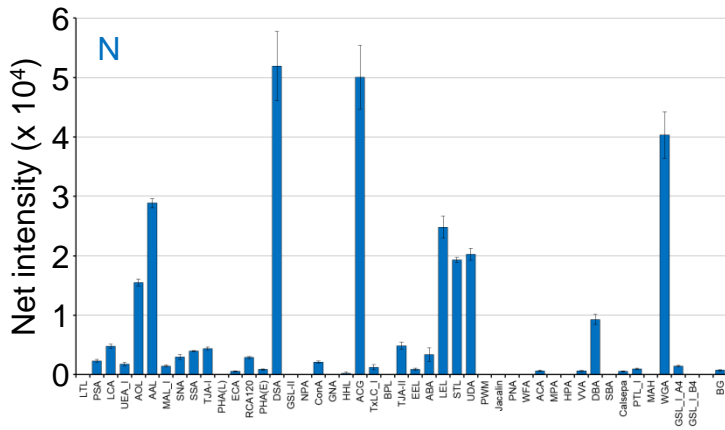

Patient No. 13 (Blood type O)

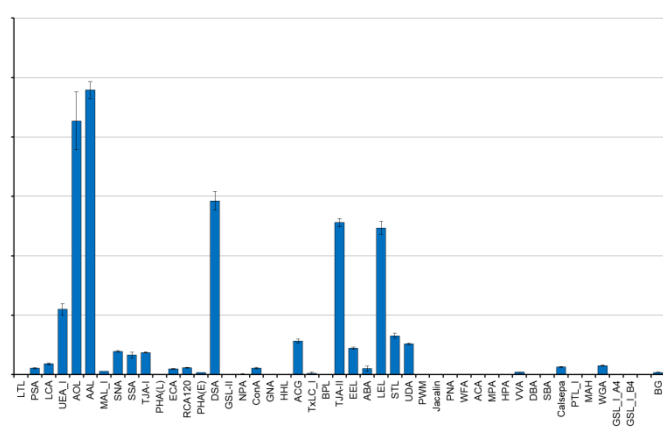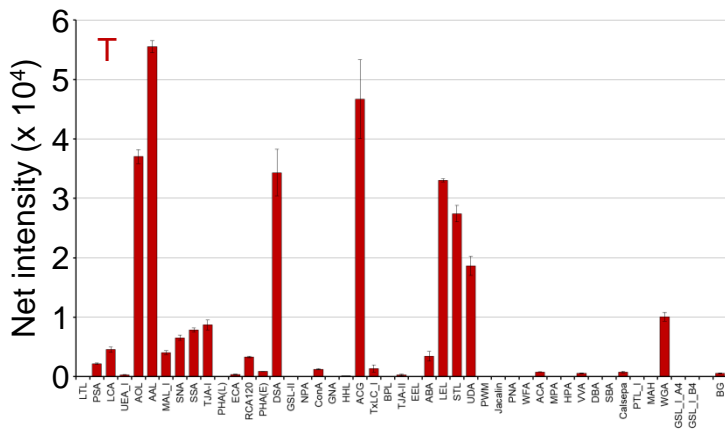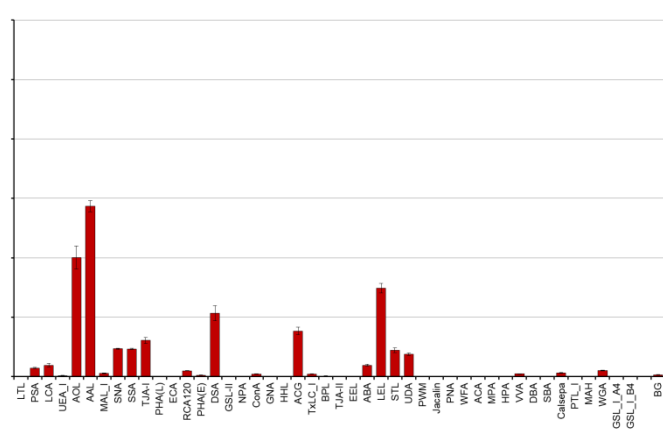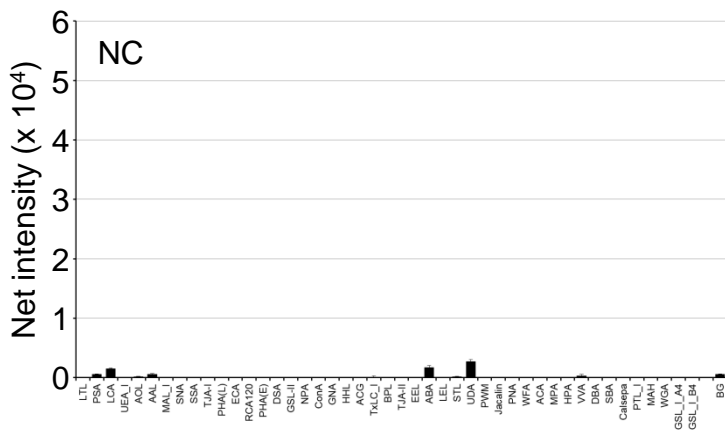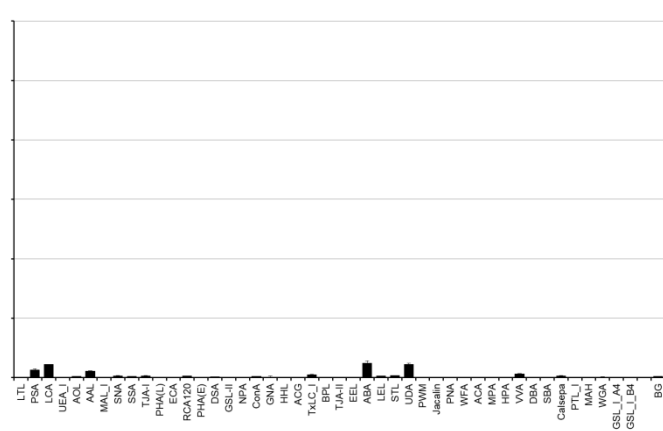

**Supplementary Figure 3. The glycan profiling of immunoprecipitated basigin from tissue extracts.** The typical glycan profiles of immunoprecipitated basigin indicated in Figure 5C. The signal values were applicable for differential analysis between tumor (T) and non-tumor (N) regions. There were no significant noises derived from the overlay antibody against basigin in the negative control (NC) without tissue samples.

A

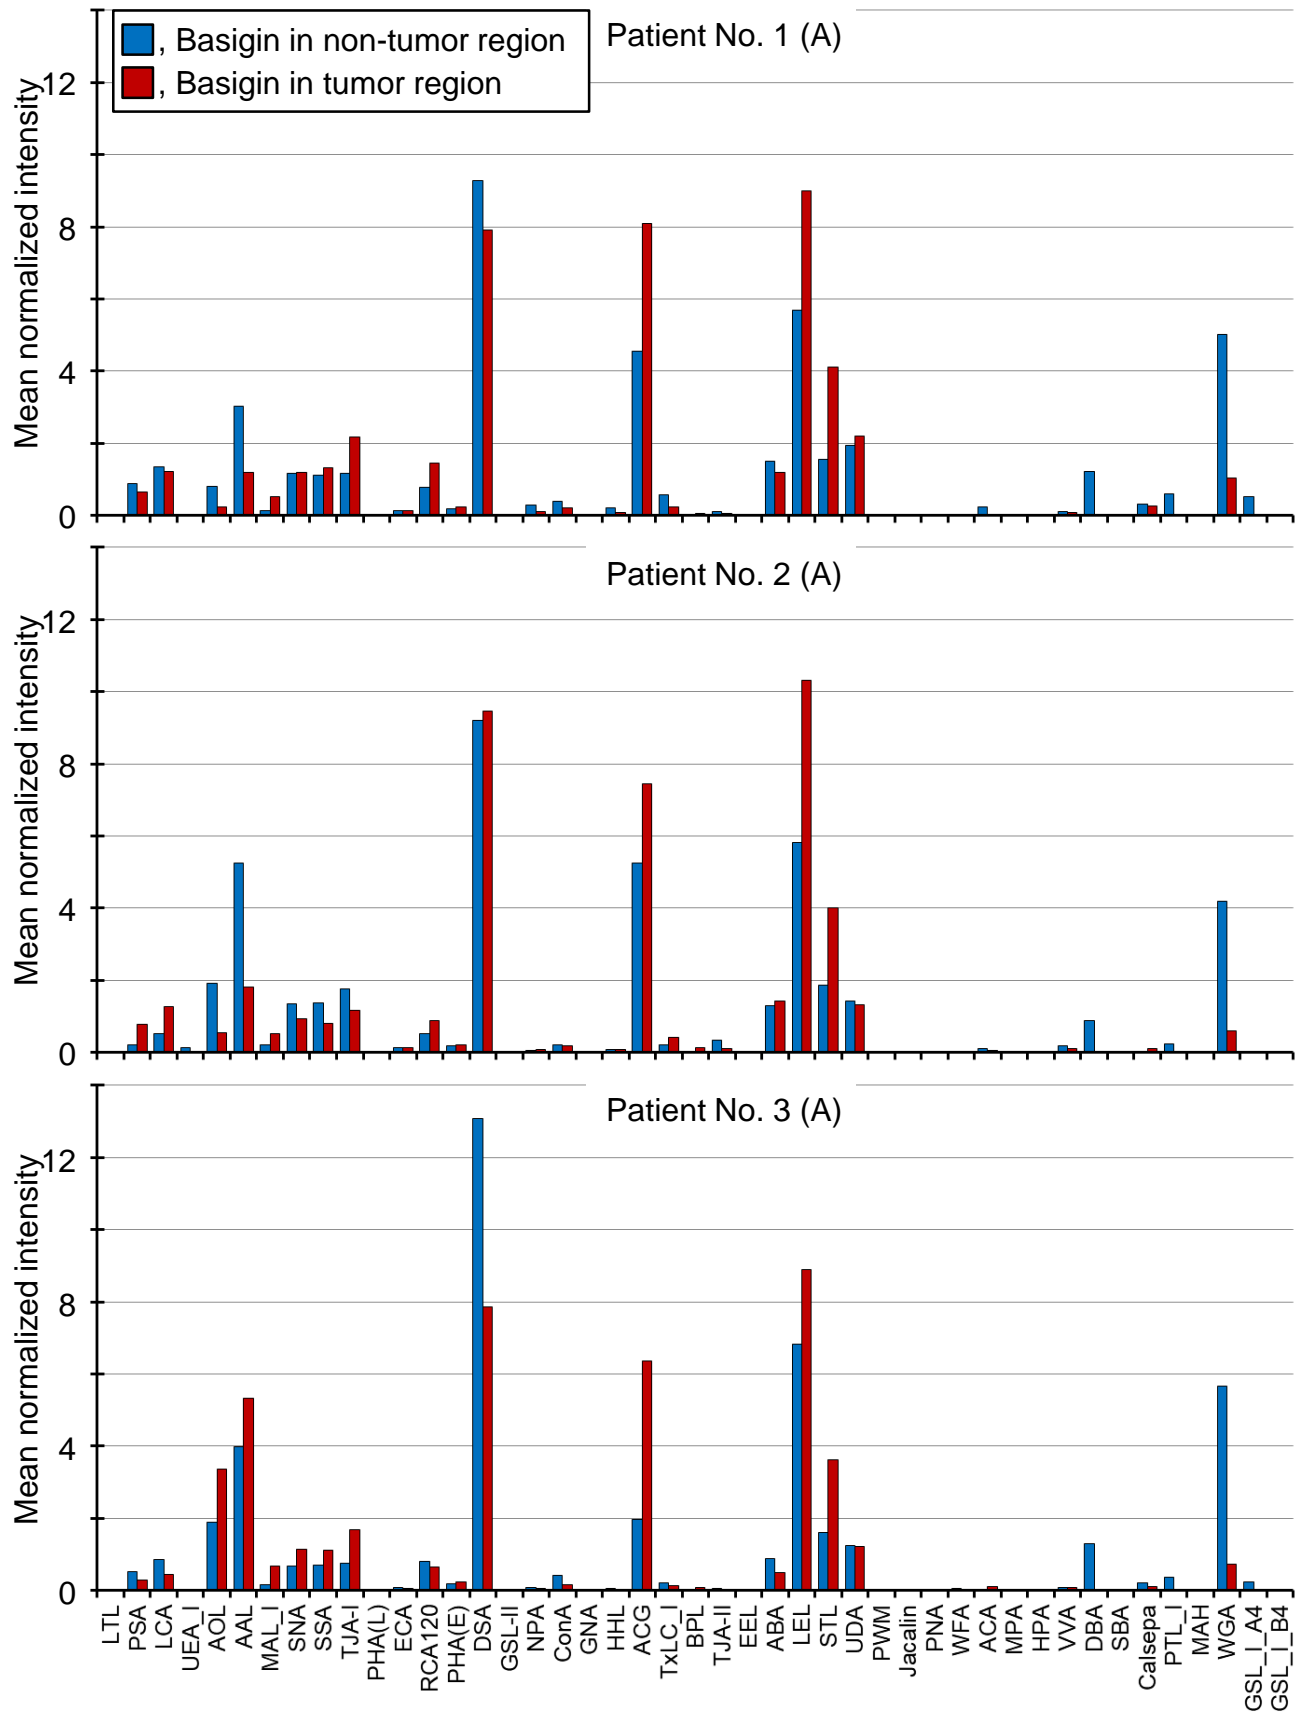

**Supplementary Figure 4. The glycan profiles of basigin immunoprecipitated from 14 PDAC tissues.** (A) Blood type A (Patient No. 1–8), (B) Blood type B (No. 9–10), (C) Blood type O (No. 11–13), and (D) Blood type AB (No.14). Blue, basigin obtained from non-tumor regions; Red, basigin obtained from tumor regions.

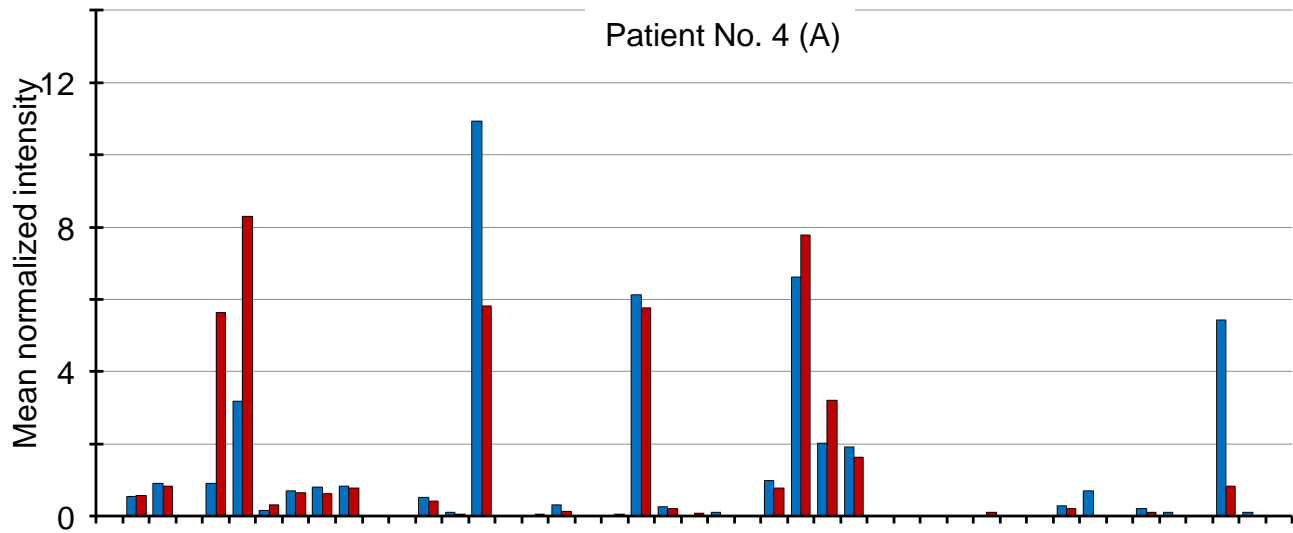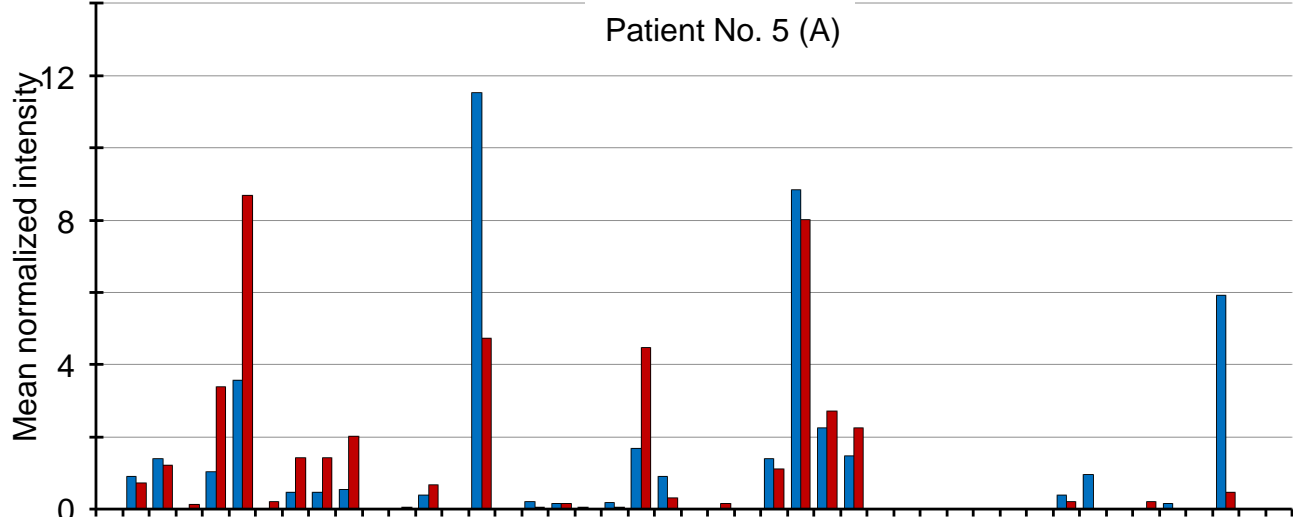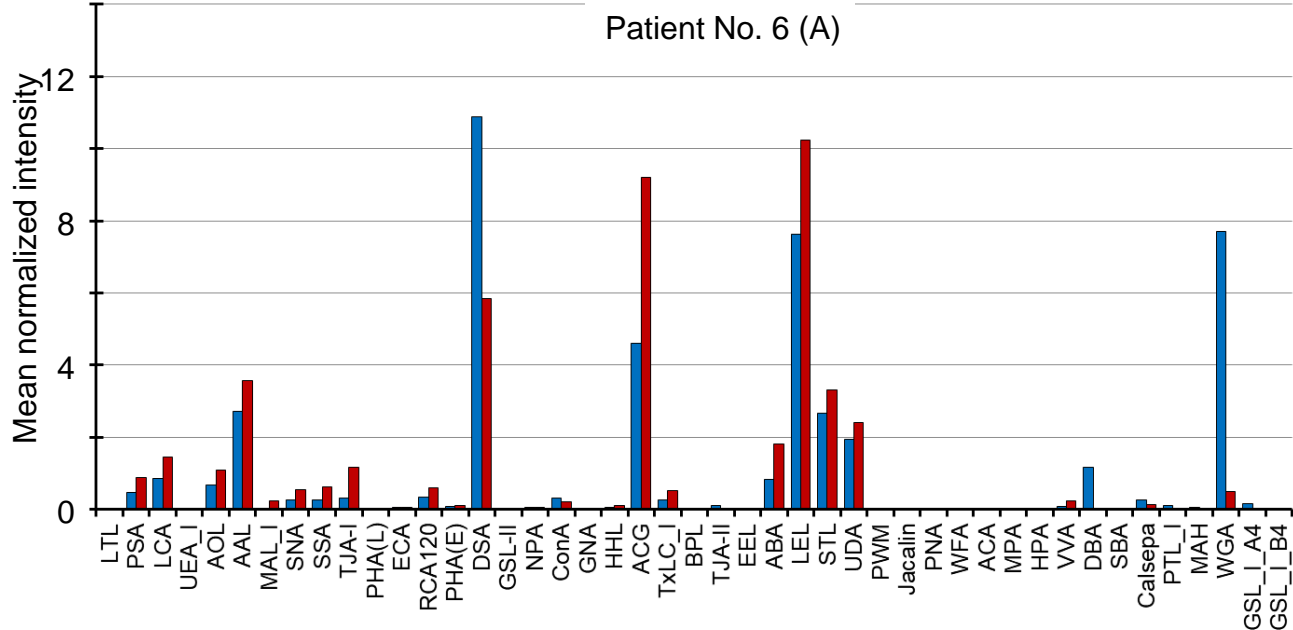

Supplementary Figure 4. Continued

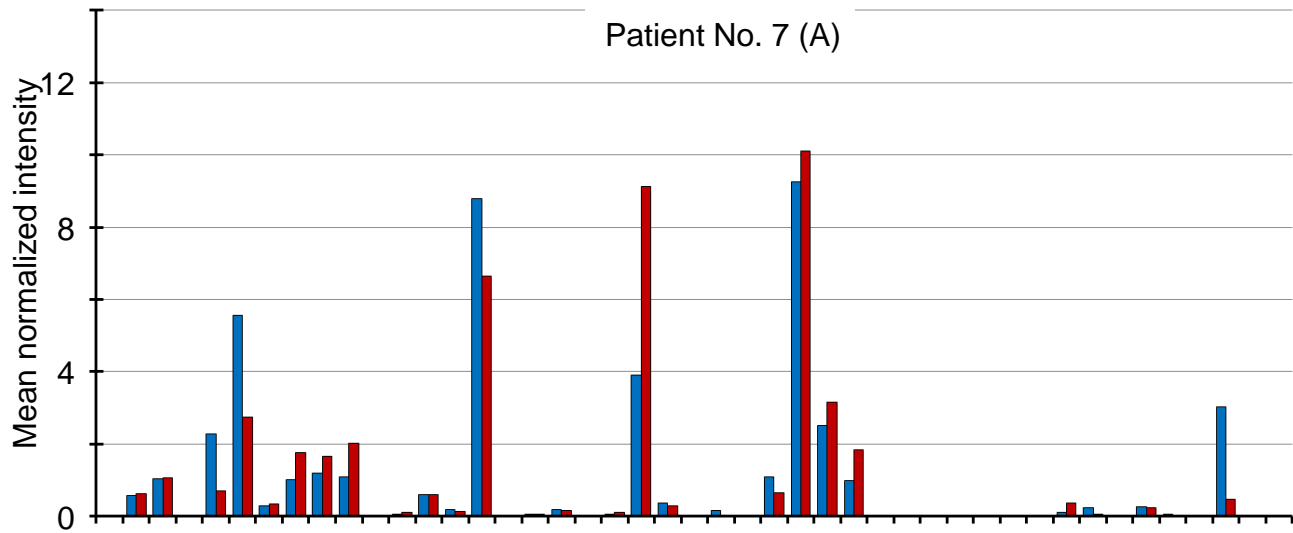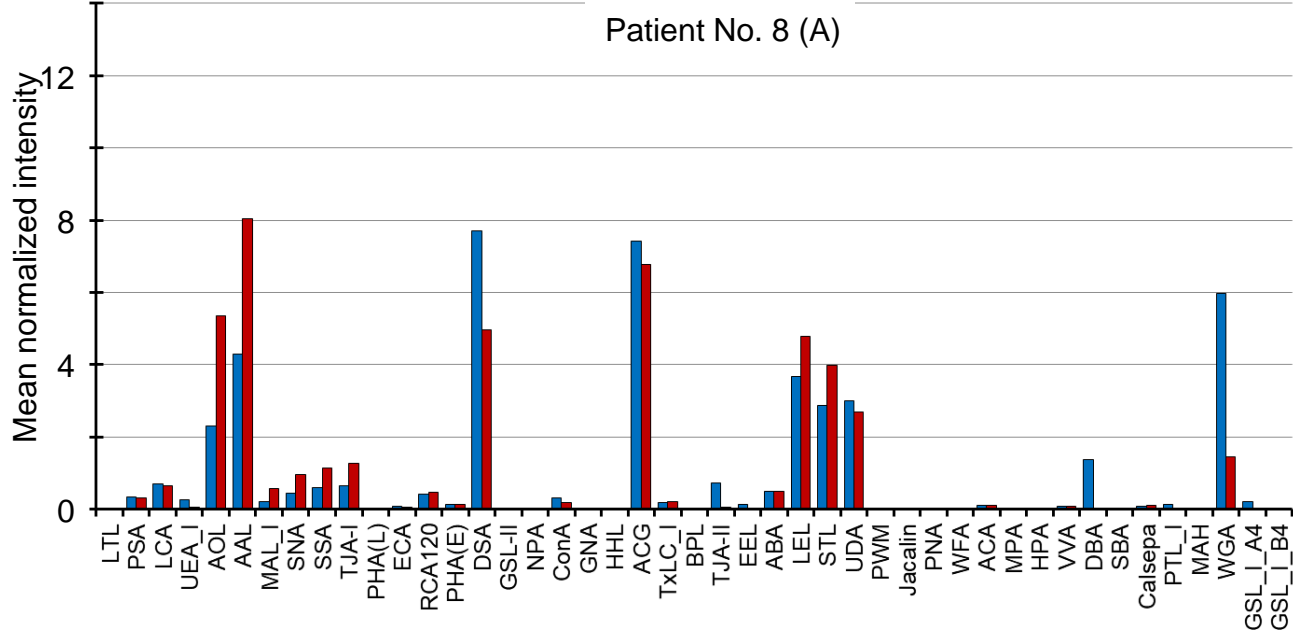

**Supplementary Figure 4. Continued**

**B**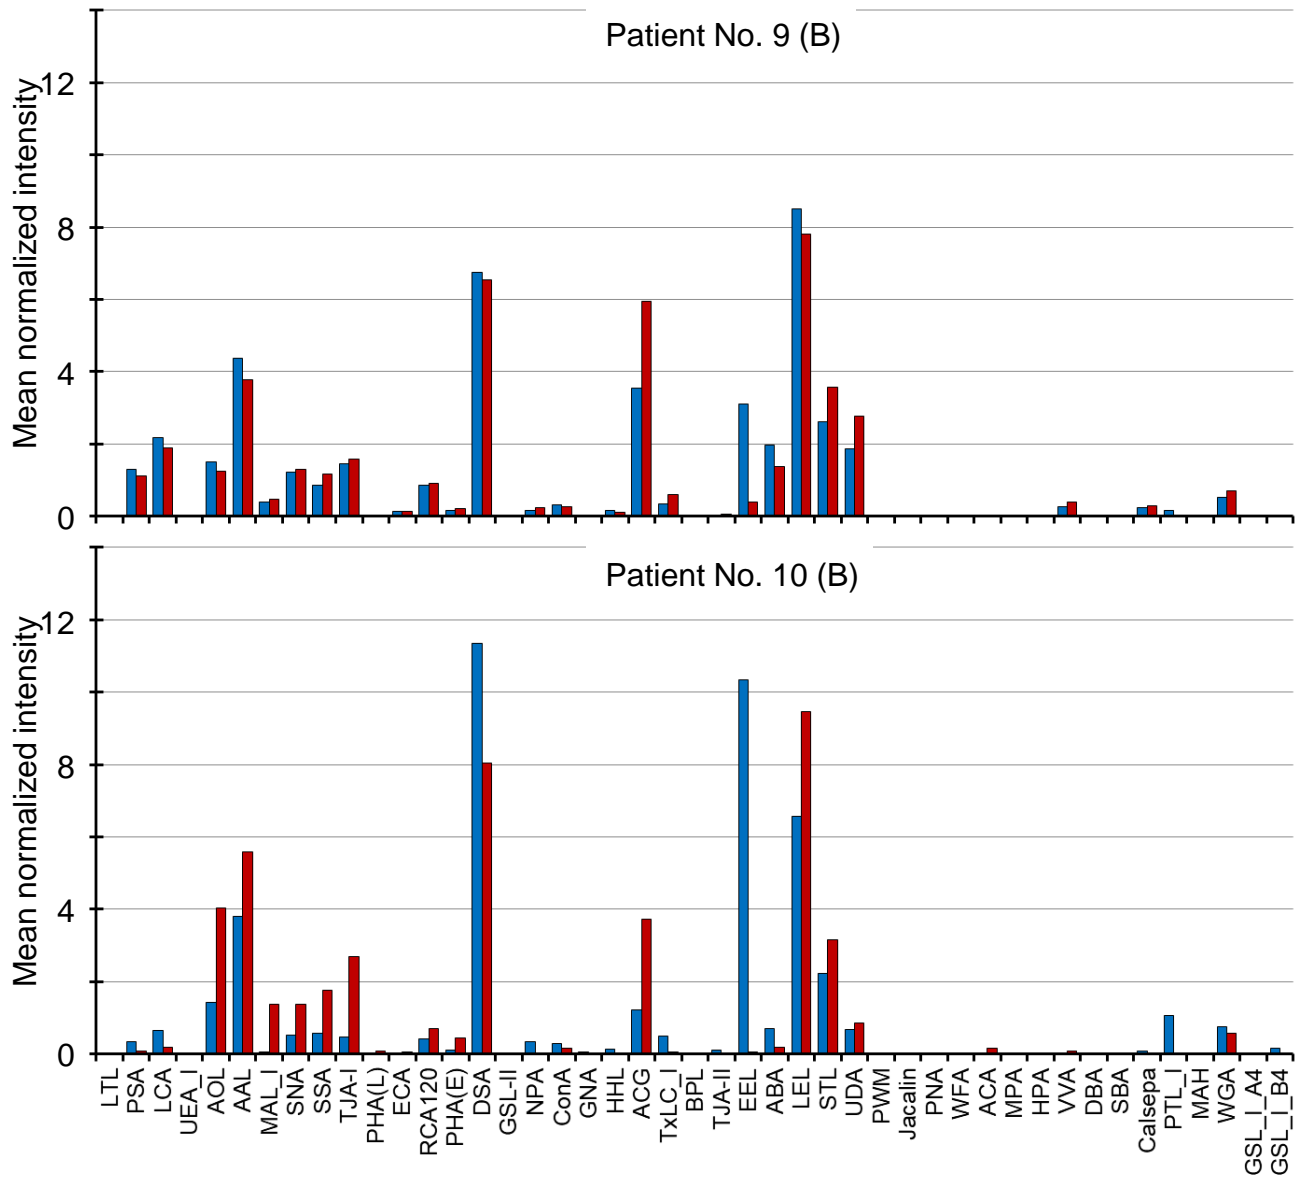**Supplementary Figure 4. Continued**

**C**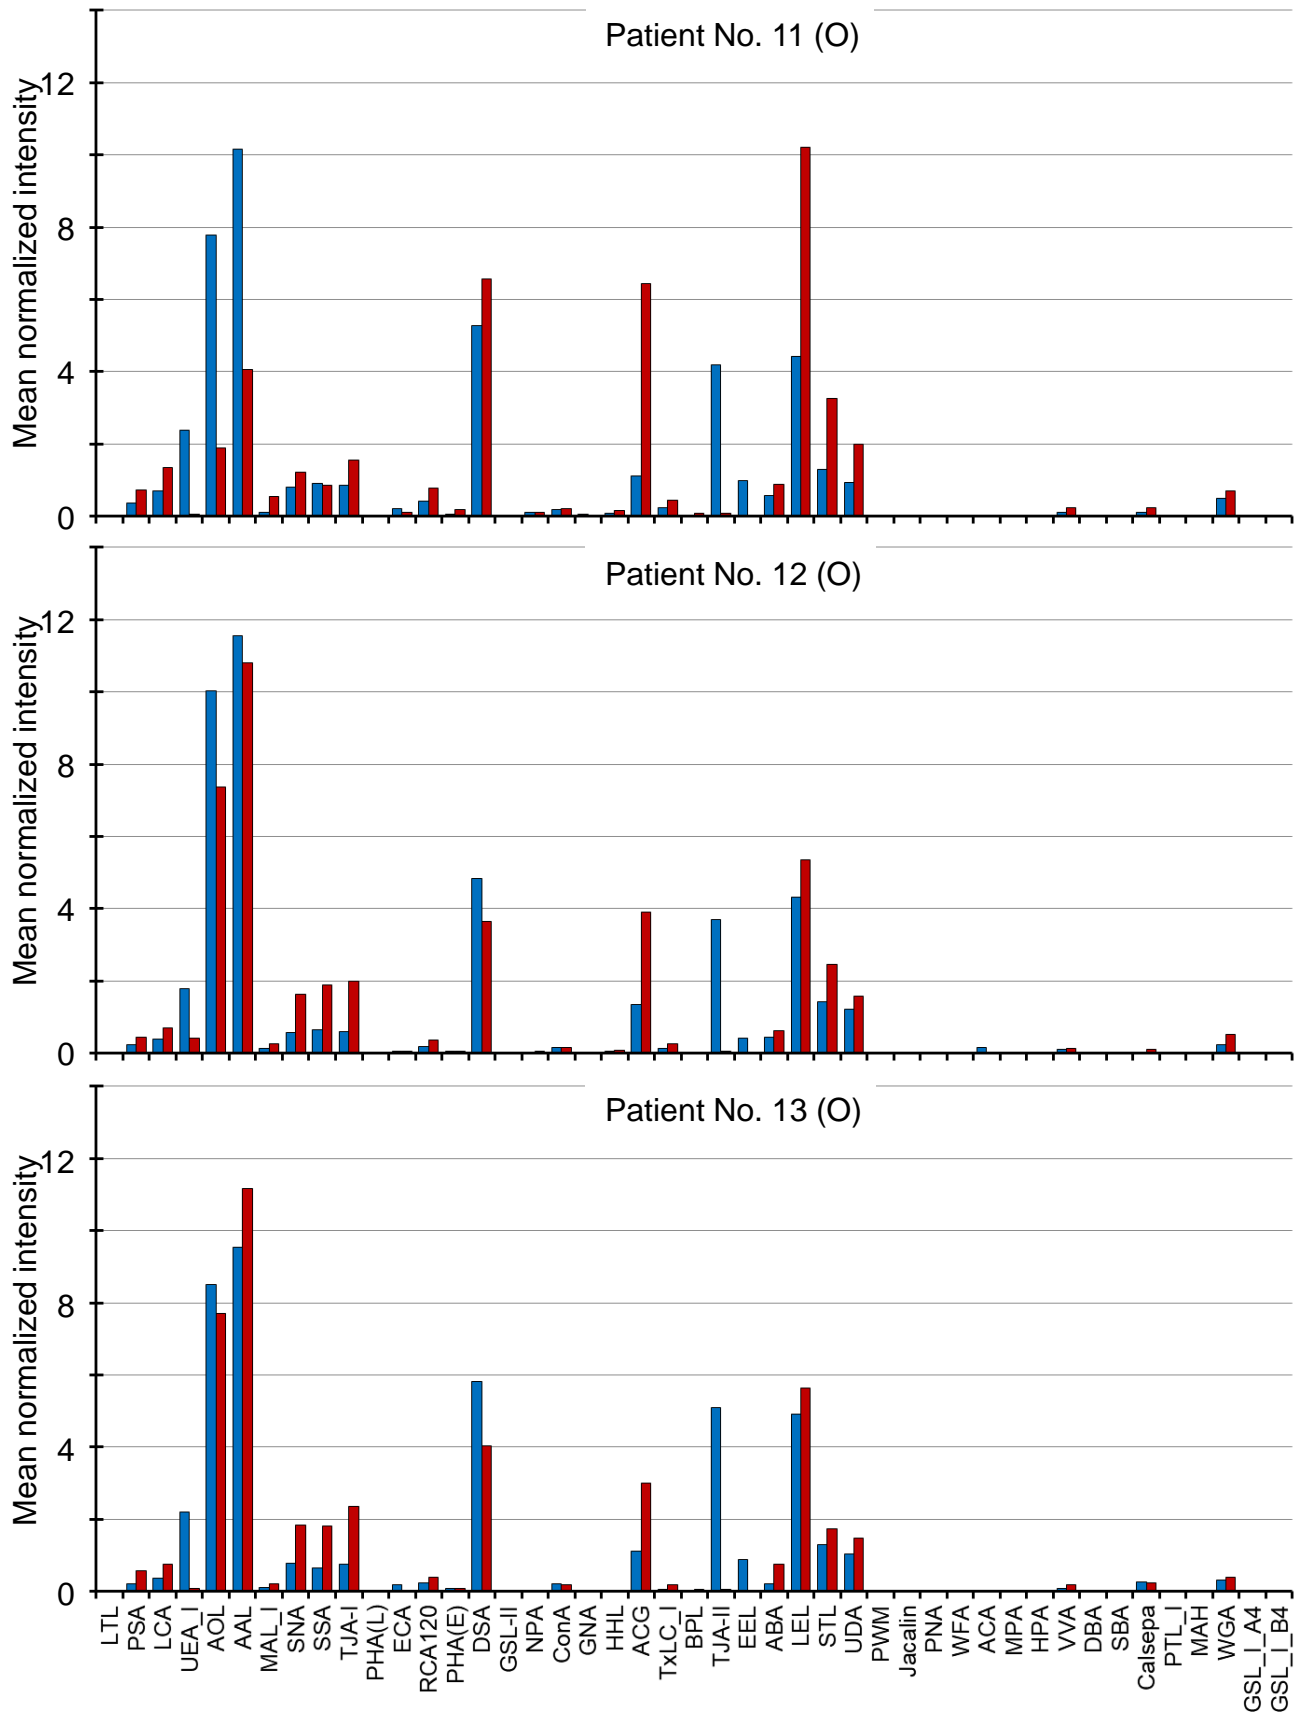**Supplementary Figure 4. Continued**

D

Patient No. 14 (AB)

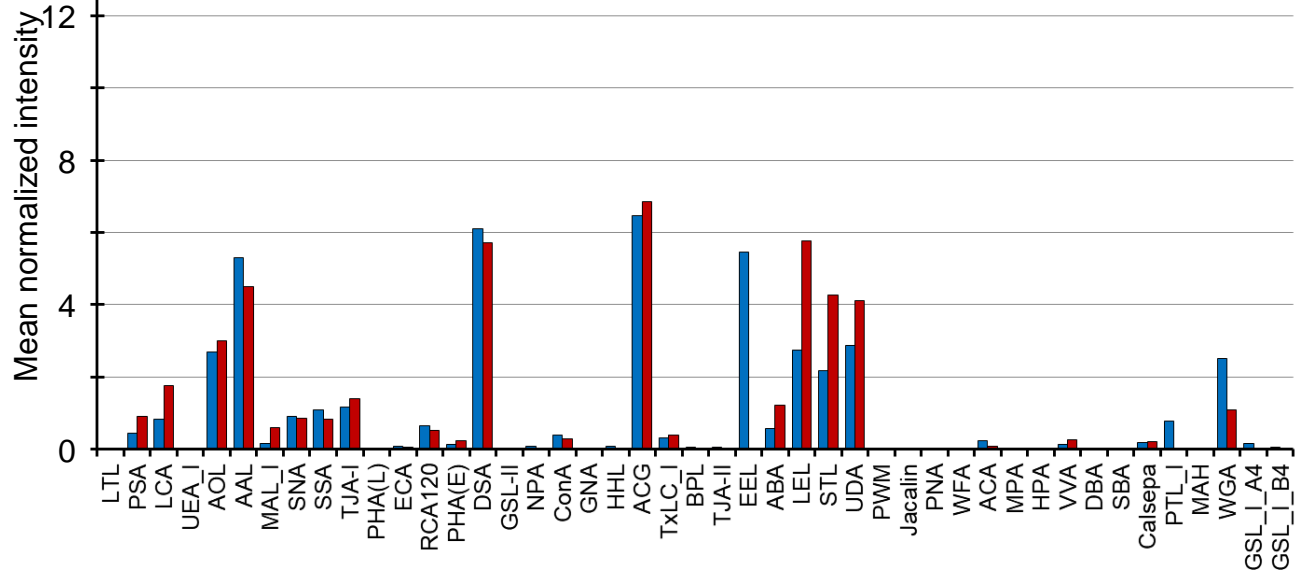

Supplementary Figure 4. Continued
